# Supplementary material for: Improved Method for the Detection of Highly Polar Pesticides and Their Main Metabolites in Foods of Animal Origin: Method Validation and Application to Monitoring Programme
Source: MDPI journal article supplement (doi:10.3390/separations10010044), 2023-01-10
Supplement: s1 [file s1]

Table S1: Preparation of matrix-matched calibration solutions.

Group A includes MPA, cyanuric acid, ethephon, fosetyl Al, glyphosate, HEPA, Maleic hydrazide, N-acetyl- glyphosate; Group B includes glufosinate ammonium, MPP and NAG;

ILIS group A includes AMPA-<sup>13</sup>C,<sup>15</sup>N cyanuric acid <sup>3</sup>C<sub>3</sub>, ethephon D<sub>4</sub>, fosetyl al D<sub>15</sub>, glyphosate 2-<sup>13</sup>C,<sup>15</sup>N, HEPA D<sub>4</sub>, N-Acetyl-glifosate <sup>13</sup>C<sub>2</sub>,<sup>15</sup>N and maleic hydrazide D<sub>2</sub>

ILIS group A includes glufosinate ammonium D<sub>3</sub>, MPP D<sub>3</sub> and NAG D<sub>3</sub>

| Matrix       | Name | Volume of extract (μL) | Volume of working solution to add to extract (μL) |     |       |                  | Final volume (μL) | [C] group A [mg/kg] | [C] group B [mg/kg] | [C] ILIS group A [mg/kg] | [C] ILIS group B [mg/kg] |
|--------------|------|------------------------|---------------------------------------------------|-----|-------|------------------|-------------------|---------------------|---------------------|--------------------------|--------------------------|
|              |      |                        | WS5                                               | WS4 | WSIS2 | H <sub>2</sub> O |                   |                     |                     |                          |                          |
| Chicken eggs | MP1  | 470                    | 10                                                |     | 20    |                  | 500               | 0.0010              | 0.0002              | 0.006                    | 0.0012                   |
|              | MP2  | 455                    | 25                                                |     | 20    |                  | 500               | 0.0025              | 0.0005              | 0.006                    | 0.0012                   |
|              | MP3  | 430                    | 50                                                |     | 20    |                  | 500               | 0.0050              | 0.0010              | 0.006                    | 0.0012                   |
|              | MP4  | 455                    |                                                   | 25  | 20    |                  | 500               | 0.0100              | 0.0020              | 0.006                    | 0.0012                   |
|              | MP5  | 430                    |                                                   | 50  | 20    |                  | 500               | 0.0200              | 0.0040              | 0.006                    | 0.0012                   |
| Cow milk     | MP1  | 250                    | 10                                                |     | 20    | 220              | 500               | 0.0010              | 0.0002              | 0.006                    | 0.0012                   |
|              | MP2  | 250                    | 25                                                |     | 20    | 205              | 500               | 0.0025              | 0.0005              | 0.006                    | 0.0012                   |
|              | MP3  | 250                    | 50                                                |     | 20    | 180              | 500               | 0.0050              | 0.0010              | 0.006                    | 0.0012                   |
|              | MP4  | 250                    |                                                   | 25  | 20    | 205              | 500               | 0.0100              | 0.0020              | 0.006                    | 0.0012                   |
|              | MP5  | 250                    |                                                   | 50  | 20    | 180              | 500               | 0.0200              | 0.0040              | 0.006                    | 0.0012                   |
|              | MP6  | 250                    |                                                   | 100 | 20    | 130              | 500               | 0.0400              | 0.0080              | 0.006                    | 0.0012                   |
| Bovine fat   | MP1  | 250                    | 10                                                |     | 20    | 220              | 500               | 0.0010              | 0.0002              | 0.006                    | 0.0012                   |
|              | MP2  | 250                    | 25                                                |     | 20    | 205              | 500               | 0.0025              | 0.0005              | 0.006                    | 0.0012                   |
|              | MP3  | 250                    | 50                                                |     | 20    | 180              | 500               | 0.0050              | 0.0010              | 0.006                    | 0.0012                   |
|              | MP4  | 250                    |                                                   | 25  | 20    | 205              | 500               | 0.0100              | 0.0020              | 0.006                    | 0.0012                   |
|              | MP5  | 250                    |                                                   | 50  | 20    | 180              | 500               | 0.0200              | 0.0040              | 0.006                    | 0.0012                   |
|              | MP6  | 250                    |                                                   | 100 | 20    | 130              | 500               | 0.0400              | 0.0080              | 0.006                    | 0.0012                   |

Table S2: MS parameters for pesticides quantification, DP: declustering potential, CE: collision energy

| Molecule                                  | Scan type   | Product of | Fragment ion (Da)  | Accumulation time (sec) | Tof MS range (da) | DP  | CE  |
|-------------------------------------------|-------------|------------|--------------------|-------------------------|-------------------|-----|-----|
| All                                       | TOF MS      | -          | -                  | 0.05                    | 79-227            | -50 | -10 |
| AMPA                                      | Product ion | 110        | 62.9641<br>78.9591 | 0.100                   | 50-115            | -30 | -33 |
| AMPA- <sup>13</sup> C, <sup>15</sup> N    | Product ion | 112        | 78.9591            | 0.05                    | 50-115            | -30 | -37 |
| Cyanuric acid                             | Product ion | 128        | 41.9985            | 0.05                    | 30-130            | -50 | -24 |
|                                           | Product ion |            | 85.0044            | 0.05                    | 30-130            | -50 | -12 |
| Cyanuric acid <sup>3</sup> C <sub>3</sub> | Product ion | 131        | 43.0019            | 0.05                    | 30-140            | -20 | -21 |
| Ethephon                                  | Product ion | 143        | 106.9904           | 0.05                    | 50-150            | -20 | -9  |
|                                           | Product ion |            | 78.9591            | 0.1                     | 50-150            | -20 | -24 |

|                                                                    |             |     |                    |      |         |     |     |
|--------------------------------------------------------------------|-------------|-----|--------------------|------|---------|-----|-----|
| Ethephon -D <sub>4</sub>                                           | Product ion | 147 | 111.0155           | 0.05 | 50-150  | -50 | -9  |
| Fosetyl-Al                                                         | Product ion | 109 | 80.9747            | 0.05 | 40-115  | -40 | -14 |
|                                                                    | Product ion |     | 62.9641            | 0.05 | 40-115  | -40 | -10 |
| Fosetyl-Al-D <sub>15</sub>                                         | Product ion | 114 | 81.9810            | 0.05 | 40-120  | -35 | -16 |
| Glufosinate                                                        | Product ion | 180 | 136.0544           | 0.05 | 40-185  | -50 | -22 |
| Glyphosate                                                         | Product ion | 168 | 62.9641            | 0.05 | 40-175  | -45 | -15 |
|                                                                    | Product ion |     | 149.9962           | 0.05 | 40-175  | -45 | -24 |
| Glyphosate - <sup>13</sup> C, <sup>15</sup> N                      | Product ion | 170 | 62.9641            | 0.1  | 40-180  | -20 | -28 |
| HEPA                                                               | Product ion | 125 | 78.9591            | 0.05 | 40-130  | -50 | -26 |
|                                                                    | Product ion |     | 62.9641            | 0.05 | 40-130  | -50 | -74 |
| HEPA-D <sub>4</sub>                                                | Product ion | 129 | 78.9591            | 0.05 | 40-135  | -25 | -34 |
| Maleic hydrazide                                                   | Product ion | 111 | 82.0054<br>83.0143 | 0.1  | 70-115  | -70 | -20 |
| Maleic hydrazide -D <sub>2</sub>                                   | Product ion | 113 | 41.9985            | 0.05 | 35-115  | -70 | -55 |
| MPP                                                                | Product ion | 151 | 62.9641            | 0.05 | 50-160  | -30 | -15 |
|                                                                    | Product ion |     | 133.0060           | 0.05 | 50-160  | -30 | -48 |
| MPP-D <sub>3</sub>                                                 | Product ion | 154 | 62.9641            | 0.05 | 40-160  | -50 | -50 |
| NAG                                                                | Product ion | 222 | 62.9641            | 0.05 | 50-230  | -50 | -27 |
|                                                                    | Product ion |     | 136.0533           | 0.05 | 50-230  | -50 | -65 |
| NAG D <sub>3</sub>                                                 | Product ion | 225 | 62.9641            | 0.05 | 40-230  | -55 | -70 |
| N-Acetyl Glyphosate                                                | Product ion | 210 | 149.9962           | 0.05 | 130-220 | -50 | -20 |
| N-Acetyl Glyphosate                                                | Product ion |     | 62.9641            | 0.05 | 50-220  | -50 | -40 |
| N-Acetyl Glyphosate <sup>13</sup> C <sub>2</sub> , <sup>15</sup> N | Product ion | 213 | 62.9641            | 0.05 | 50-220  | -74 | -20 |
| Glufosinate-D <sub>3</sub>                                         | Product ion | 183 | 98.0091            | 0.05 | 40-190  | -50 | -20 |

Table S3: Exact masses of precursor ions (\*) extract by TOF MS experiment and exact masses of product ion used for quantification (1) and qualification (2).

| Molecule | Exact mass | Chicken Egg | Bovine fat | Cow milk |
|----------|------------|-------------|------------|----------|
| AMPA     | 110.0012*  |             | 2          | 2        |
|          | 62.9641    | 1           | 1          | 1        |
|          | 78.9591    | 2           |            |          |

|                                                                       |           |   |   |   |
|-----------------------------------------------------------------------|-----------|---|---|---|
| AMPA- <sup>13</sup> C, <sup>15</sup> N                                | 78.9591   | 1 | 1 | 1 |
| Cyanuric acid                                                         | 128.0102* | 1 | 2 | 2 |
|                                                                       | 41.9985   | 2 | 1 | 1 |
| Cyanuric acid <sup>3</sup> C <sub>3</sub>                             | 142.9670* | 1 |   |   |
|                                                                       | 43.0019   |   | 1 | 1 |
| Ethephon                                                              | 106.9904  | 1 | 1 | 1 |
|                                                                       | 78.9591   | 2 | 2 | 2 |
| Ethephon -D <sub>4</sub>                                              | 111.0155  | 1 | 1 | 1 |
| Fosetyl-Al                                                            | 80.9747   | 1 | 1 | 1 |
|                                                                       | 62.9641   | 2 | 2 | 2 |
| Fosetyl-Al-D <sub>15</sub>                                            | 81.9810   | 1 | 1 | 1 |
| Glufosinate                                                           | 180.0431* | 1 | 1 | 1 |
|                                                                       | 136.0544  | 2 | 2 | 2 |
| Glufosinate-D <sub>3</sub>                                            | 183.0619* | 1 | 1 | 1 |
| Glyphosate                                                            | 168.0067* | 2 |   | 2 |
|                                                                       | 62.9641   | 1 | 1 | 1 |
|                                                                       | 149.9962  |   | 2 |   |
| Glyphosate - <sup>13</sup> C, <sup>15</sup> N                         | 62.9641   | 1 | 1 | 1 |
| HEPA                                                                  | 78.9591   | 1 | 1 | 1 |
|                                                                       | 62.9641   | 2 | 2 | 2 |
| HEPA-D <sub>4</sub>                                                   | 78.9591   | 1 | 1 | 1 |
| Maleic hydrazide                                                      | 82.0054   | 1 | 1 | 1 |
|                                                                       | 83.0143   | 2 | 2 | 2 |
| Maleic hydrazide -<br>D <sub>2</sub>                                  | 41.9985   |   | 1 |   |
| MPP                                                                   | 151.0166* |   | 2 | 2 |
|                                                                       | 62.9641   | 1 | 1 | 1 |
|                                                                       | 133.006   | 2 |   |   |
| MPP-D <sub>3</sub>                                                    | 62.9641   | 1 | 1 | 1 |
| NAG                                                                   | 222.0537* | 2 | 1 | 2 |
|                                                                       | 62.9641   | 1 | 2 | 1 |
| NAG D <sub>3</sub>                                                    | 225.0725* |   | 1 |   |
|                                                                       | 62.9641   | 1 |   | 1 |
| N-Acetyl<br>Glyphosate                                                | 149.9962  | 1 | 1 | 1 |
|                                                                       | 62.9641   | 2 | 2 | 2 |
| N-Acetyl<br>Glyphosate <sup>13</sup> C <sub>2</sub> , <sup>15</sup> N | 62.9641   | 1 | 1 | 1 |

Table S4: Relative expanded measurement uncertainty (U') data

|             | U' (expanded MU) (%) |            |          |
|-------------|----------------------|------------|----------|
|             | Chicken Egg          | Bovine fat | Cow milk |
| Glufosinate | 45                   | 41         | 27       |
| MPP         | 48                   | 37         | 24       |
| NAG         | 48                   | 46         | 18       |
| Glyphosate  | 39                   | 33         | 15       |

Table S5. AMPA - Verification of linearity using the method specified in C17 of the document SANTE/2019/12682

| AMPA                               |         |         |                                    |         |         |                                    |         |          |
|------------------------------------|---------|---------|------------------------------------|---------|---------|------------------------------------|---------|----------|
| Eggs                               |         |         | Bovine fat                         |         |         | Milk                               |         |          |
| X                                  | BCC     | Δ%      | X                                  | BCC     | Δ%      | X                                  | BCC     | Δ%       |
| 0                                  | 0.1692  |         | 0                                  | 0.5768  |         | 0                                  | -0.0545 |          |
| 1                                  | 0.9195  | -8.0548 | 2.5                                | 2.3709  | -5.1630 | 2.5                                | 2.2426  | -10.2962 |
| 2.5                                | 2.6109  | 4.4378  | 5                                  | 4.8476  | -3.0481 | 5                                  | 5.1948  | 3.8964   |
| 5                                  | 5.0212  | 0.4230  | 10                                 | 9.3038  | -6.9618 | 10                                 | 10.2892 | 2.8921   |
| 10                                 | 9.6115  | -3.8850 | 20                                 | 20.4526 | 2.2630  | 20                                 | 19.8278 | -0.8608  |
| 20                                 | 20.1678 | 0.8389  | 40                                 | 39.9482 | -0.1294 |                                    |         |          |
| Average calibration curve equation |         |         | Average calibration curve equation |         |         | Average calibration curve equation |         |          |
| y=0.0644x-0.0106                   |         |         | y=0.1291x-0.0730                   |         |         | y=0.0534x-0.003                    |         |          |
| R <sup>2</sup> 0.999               |         |         | R <sup>2</sup> 0.999               |         |         | R <sup>2</sup> 0.999               |         |          |

Table S6. Cyanuric acid - Verification of linearity using the method specified in C17 of the document SANTE/2019/12682

| Cyanuric acid                      |         |         |                                    |         |          |                                    |         |         |
|------------------------------------|---------|---------|------------------------------------|---------|----------|------------------------------------|---------|---------|
| Eggs                               |         |         | Bovine fat                         |         |          | Milk                               |         |         |
| X                                  | BCC     | Δ%      | X                                  | BCC     | Δ%       | X                                  | BCC     | Δ%      |
| 0                                  | 0,4270  |         | 0                                  | 0,5726  |          | 0                                  | 0.8706  |         |
| 2.5                                | 2,3898  | -4,4080 | 1                                  | 1,1105  | 11,0518  | 2.5                                | 2.6658  | 6.6333  |
| 5                                  | 4,8371  | -3,2573 | 2.5                                | 2,2065  | -11,7391 | 5                                  | 4.5959  | -8.0827 |
| 10                                 | 9,6243  | -3,7574 | 5                                  | 4,5790  | -8,4206  | 10                                 | 9.3713  | -6.2866 |
| 20                                 | 20,2218 | 1,1090  | 10                                 | 9,8555  | -1,4455  | 20                                 | 19.6757 | -1.6217 |
|                                    |         |         | 20                                 | 20,1759 | 0,8796   | 40                                 | 40.3207 | 0.8017  |
| Average calibration curve equation |         |         | Average calibration curve equation |         |          | Average calibration curve equation |         |         |
| y=0.1880x-0.0780                   |         |         | y=0.1006x-0.0562                   |         |          | y=0.0362x-0.0309                   |         |         |
| R <sup>2</sup> 0.998               |         |         | R <sup>2</sup> 0.997               |         |          | R <sup>2</sup> 0.999               |         |         |

Table S7. Ethephon - Verification of linearity using the method specified in C17 of the document  
SANTE/2019/12682

| Ethephon                           |         |          |                                    |         |         |                                    |         |          |
|------------------------------------|---------|----------|------------------------------------|---------|---------|------------------------------------|---------|----------|
| Eggs                               |         |          | Bovine fat                         |         |         | Milk                               |         |          |
| X                                  | BCC     | Δ%       | X                                  | BCC     | Δ%      | X                                  | BCC     | Δ%       |
| 0                                  | 0.9190  |          | 0                                  | 0.9055  |         | 0                                  | 1.2316  |          |
| 2.5                                | 2.4385  | -2.4596  | 2.5                                | 2.3970  | -4.1210 | 2.5                                | 2.6437  | 5.7499   |
| 5                                  | 4.4706  | -10.5878 | 5                                  | 4.9913  | -0.1731 | 5                                  | 4.6601  | -6.7985  |
| 10                                 | 9.2505  | -7.4949  | 10                                 | 9.6274  | -3.7263 | 10                                 | 8.8513  | -11.4871 |
| 20                                 | 20.4214 | 2.1069   | 20                                 | 19.0621 | -4.6894 | 20                                 | 19.7439 | -1.2805  |
|                                    |         |          | 40                                 | 40.5167 | 1.2918  | 40                                 | 40.3694 | 0.9234   |
| Average calibration curve equation |         |          | Average calibration curve equation |         |         | Average calibration curve equation |         |          |
| y=0.1014x-0.088                    |         |          | y=0.0915x-0.080                    |         |         | y=0.0591x-0.0709                   |         |          |
| R <sup>2</sup>                     |         |          | R <sup>2</sup>                     |         |         | R <sup>2</sup>                     |         |          |
| 0.992                              |         |          | 0.99812773                         |         |         | 0.997                              |         |          |

Table S8. Fosetyl - Verification of linearity using the method specified in C17 of the document  
SANTE/2019/12682

| Fosetyl aluminum                   |         |          |                                    |         |         |                                    |         |          |
|------------------------------------|---------|----------|------------------------------------|---------|---------|------------------------------------|---------|----------|
| Eggs                               |         |          | Bovine fat                         |         |         | Milk                               |         |          |
| X                                  | BCC     | Δ%       | X                                  | BCC     | Δ%      | X                                  | BCC     | Δ%       |
| 0                                  | 0.5726  |          | 0                                  | 0.4677  |         | 0                                  | 0.5811  |          |
| 1                                  | 1.1105  | 11.0518  | 1                                  | 1.0740  | 7.4016  | 1                                  | 1.1398  | 13.9799  |
| 2.5                                | 2.2065  | -11.7391 | 2.5                                | 2.3942  | -4.2292 | 2.5                                | 2.2071  | -11.7170 |
| 5                                  | 4.5790  | -8.4206  | 5                                  | 5.0604  | 1.2085  | 5                                  | 4.6793  | -6.4145  |
| 10                                 | 9.8555  | -1.4455  | 10                                 | 9.8363  | -1.6369 | 10                                 | 9.6398  | -3.6019  |
| 20                                 | 20.1759 | 0.8796   | 20                                 | 19.3024 | -3.4880 | 20                                 | 20.2529 | 1.2646   |
|                                    |         |          | 40                                 | 40.3647 | 0.9120  |                                    |         |          |
| Average calibration curve equation |         |          | Average calibration curve equation |         |         | Average calibration curve equation |         |          |
| y=0.1006x-0.0562                   |         |          | y=0.1047x-0.0482                   |         |         | y=0.0930x-0.0527                   |         |          |
| R <sup>2</sup>                     |         |          | R <sup>2</sup>                     |         |         | R <sup>2</sup>                     |         |          |
| 0.998                              |         |          | 0.999                              |         |         | 0.997                              |         |          |

Table S9. Glyphosate - Verification of linearity using the method specified in C17 of the document  
SANTE/2019/12682

| Glyphosate                                             |         |              |                                                        |         |               |                                                        |         |              |
|--------------------------------------------------------|---------|--------------|--------------------------------------------------------|---------|---------------|--------------------------------------------------------|---------|--------------|
| Eggs                                                   |         |              | Bovine fat                                             |         |               | Milk                                                   |         |              |
| X                                                      | BCC     | Δ%           | X                                                      | BCC     | Δ%            | X                                                      | BCC     | Δ%           |
| 0.0                                                    | 0.4916  |              | 0.0                                                    | 1.3805  |               | 0.0                                                    | 0.2862  |              |
| 1.0                                                    | 1.1987  | <b>19.87</b> | 2.5                                                    | 2.5444  | <b>1.77</b>   | 1.0                                                    | 1.0656  | <b>6.56</b>  |
| 2.5                                                    | 2.2873  | <b>-8.51</b> | 5.0                                                    | 5.0145  | <b>0.29</b>   | 2.5                                                    | 2.4401  | <b>-2.40</b> |
| 5.0                                                    | 4.8392  | <b>-3.22</b> | 10.0                                                   | 8.7942  | <b>-12.06</b> | 5.0                                                    | 4.9095  | <b>-1.81</b> |
| 10.0                                                   | 9.3426  | <b>-6.57</b> | 20.0                                                   | 19.1608 | <b>-4.20</b>  | 10.0                                                   | 9.5762  | <b>-4.24</b> |
| 20.0                                                   | 20.3405 | <b>1.70</b>  | 40.0                                                   | 40.6057 | <b>1.51</b>   | 20.0                                                   | 20.2224 | <b>1.11</b>  |
| Average calibration curve equation<br>$y=0.045x-0.021$ |         |              | Average calibration curve equation<br>$y=0.073x-0.098$ |         |               | Average calibration curve equation<br>$y=0.040x-0.011$ |         |              |
| R <sup>2</sup> 0.997                                   |         |              | R <sup>2</sup> 0.996                                   |         |               | R <sup>2</sup> 0.999                                   |         |              |

Table S10. HEPA - Verification of linearity using the method specified in C17 of the document  
SANTE/2019/12682

| HEPA                                                    |         |         |                                                          |         |         |                                                          |         |          |
|---------------------------------------------------------|---------|---------|----------------------------------------------------------|---------|---------|----------------------------------------------------------|---------|----------|
| Eggs                                                    |         |         | Bovine fat                                               |         |         | Milk                                                     |         |          |
| X                                                       | BCC     | Δ%      | X                                                        | BCC     | Δ%      | X                                                        | BCC     | Δ%       |
| 0                                                       | 0.6594  |         | 0                                                        | 0.3822  |         | 0                                                        | 0.5357  |          |
| 2.5                                                     | 2.4322  | -2.7122 | 1                                                        | 0.9779  | -2.2096 | 2.5                                                      | 2.7624  | 10.4951  |
| 5                                                       | 4.7111  | -5.7778 | 2.5                                                      | 2.4350  | -2.6018 | 5                                                        | 5.1146  | 2.2927   |
| 10                                                      | 9.3416  | -6.5844 | 5                                                        | 4.6862  | -6.2769 | 10                                                       | 8.5668  | -14.3316 |
| 20                                                      | 20.3558 | 1.7789  | 10                                                       | 9.8899  | -1.1006 | 20                                                       | 20.5204 | 2.6022   |
|                                                         |         |         | 20                                                       | 20.1288 | 0.6441  |                                                          |         |          |
| Average calibration curve equation<br>$y=0.061x-0.0384$ |         |         | Average calibration curve equation<br>$y=0.0925x-0.0348$ |         |         | Average calibration curve equation<br>$y=0.0634x-0.0291$ |         |          |
| R <sup>2</sup> 0.996                                    |         |         | R <sup>2</sup> 0.999                                     |         |         | R <sup>2</sup> 0.989                                     |         |          |

Table S11. Maleic hydrazide - Verification of linearity using the method specified in C17 of the document SANTE/2019/12682

| Maleic hydrazide                                             |          |         |                                                          |         |          |                                                              |         |         |
|--------------------------------------------------------------|----------|---------|----------------------------------------------------------|---------|----------|--------------------------------------------------------------|---------|---------|
| Eggs                                                         |          |         | Bovine fat                                               |         |          | Milk                                                         |         |         |
| X                                                            | BCC      | Δ%      | X                                                        | BCC     | Δ%       | X                                                            | BCC     | Δ%      |
| 0                                                            |          | 0.4032  | 0                                                        | 0.6449  |          | 0                                                            | 0.2188  |         |
| 1                                                            | 13.9050  | 1.1390  | 1                                                        | 1.1666  | 16.6563  | 1                                                            | 1.1140  | 11.3969 |
| 2.5                                                          | 19.7763  | 2.9944  | 2.5                                                      | 2.0322  | -18.7106 | 2.5                                                          | 2.6104  | 4.4167  |
| 5                                                            | 0.1733   | 5.0087  | 5                                                        | 4.4651  | -10.6977 | 5                                                            | 4.5853  | -8.2933 |
| 10                                                           | -16.1358 | 8.3864  | 10                                                       | 10.1114 | 1.1144   | 10                                                           | 9.8057  | -1.9428 |
| 20                                                           | 2.8411   | 20.5682 | 20                                                       | 20.0798 | 0.3989   | 20                                                           | 20.1658 | 0.8290  |
| Average calibration curve equation<br>$y=499.6199x-165.7237$ |          |         | Average calibration curve equation<br>$y=0.0490x-0.0255$ |         |          | Average calibration curve equation<br>$y=474.6082x-100.6250$ |         |         |
| R <sup>2</sup>                                               | 0.988    |         | R <sup>2</sup>                                           | 0.997   |          | R <sup>2</sup>                                               | 0.999   |         |

Table S12. N acetyl glyphosate - Verification of linearity using the method specified in C17 of the document SANTE/2019/12682

| N acetyl glyphosate                                     |         |         |                                                         |         |         |                                                          |         |         |
|---------------------------------------------------------|---------|---------|---------------------------------------------------------|---------|---------|----------------------------------------------------------|---------|---------|
| Eggs                                                    |         |         | Bovine fat                                              |         |         | Milk                                                     |         |         |
| X                                                       | BCC     | Δ%      | X                                                       | BCC     | Δ%      | X                                                        | BCC     | Δ%      |
| 0                                                       |         | 0.1045  | 0                                                       | 0.1785  |         | 0                                                        | 0.2677  |         |
| 1                                                       | 3.6591  | 1.0366  | 1                                                       | 1.0670  | 6.6995  | 1                                                        | 1.1515  | 15.1493 |
| 2.5                                                     | -0.4756 | 2.4881  | 2.5                                                     | 2.4561  | -1.7541 | 2.5                                                      | 2.5692  | 2.7661  |
| 5                                                       | 0.3555  | 5.0178  | 5                                                       | 4.6291  | -7.4179 | 5                                                        | 4.7786  | -4.4286 |
| 10                                                      | -2.7397 | 9.7260  | 10                                                      | 10.1693 | 1.6926  | 10                                                       | 9.4423  | -5.5770 |
| 20                                                      | 0.6350  | 20.1270 |                                                         |         |         | 20                                                       | 20.2908 | 1.4539  |
| Average calibration curve equation<br>$y=0.0527x-0.005$ |         |         | Average calibration curve equation<br>$y=0.062x-0.0103$ |         |         | Average calibration curve equation<br>$y=0.0493x-0.0126$ |         |         |
| R <sup>2</sup>                                          | 0.999   |         | R <sup>2</sup>                                          | 0.997   |         | R <sup>2</sup>                                           | 0.998   |         |

Table S13. Glufosinate ammonium - Verification of linearity using the method specified in C17 of the document SANTE/2019/12682

| Glufosinate ammonium               |        |        |                                    |        |       |                                    |        |        |
|------------------------------------|--------|--------|------------------------------------|--------|-------|------------------------------------|--------|--------|
| Eggs                               |        |        | Bovine fat                         |        |       | Milk                               |        |        |
| X                                  | BCC    | Δ%     | X                                  | BCC    | Δ%    | X                                  | BCC    | Δ%     |
| 0.0                                | 0.2789 |        | 0.0                                | 0.0784 |       | 0.0                                | 0.2600 |        |
| 0.5                                | 0.5436 | 8.72   | 0.5                                | 0.4863 | -2.74 | 0.5                                | 0.5369 | 7.38   |
| 1.0                                | 0.8843 | -11.57 | 1.0                                | 0.9934 | -0.66 | 1.0                                | 0.9481 | -5.19  |
| 2.0                                | 1.6551 | -17.24 | 2.0                                | 1.8113 | -9.43 | 2.0                                | 1.7405 | -12.97 |
| 4.0                                | 4.1382 | 3.45   | 4.0                                | 4.1830 | 4.57  | 4.0                                | 3.9289 | -1.78  |
|                                    |        |        | 8.0                                | 7.9476 | -0.66 | 8.0                                | 8.0857 | 1.07   |
| Average calibration curve equation |        |        | Average calibration curve equation |        |       | Average calibration curve equation |        |        |
| y=0.758x-0.190                     |        |        | y=0.824x-0.061                     |        |       | y=0.923x-0.233                     |        |        |
| R <sup>2</sup>                     |        |        | R <sup>2</sup>                     |        |       | R <sup>2</sup>                     |        |        |
| 0.977                              |        |        | 0.998                              |        |       | 0.997                              |        |        |

Table S14. MPP - Verification of linearity using the method specified in C17 of the document SANTE/2019/12682

| MPP                                |        |       |                                    |        |        |                                    |        |       |
|------------------------------------|--------|-------|------------------------------------|--------|--------|------------------------------------|--------|-------|
| Eggs                               |        |       | Bovine fat                         |        |        | Milk                               |        |       |
| X                                  | BCC    | Δ%    | X                                  | BCC    | Δ%     | X                                  | BCC    | Δ%    |
| 0.0                                | 0.1534 |       | 0.0                                | 0.3048 |        | 0.0                                | 0.0725 |       |
| 0.5                                | 0.4784 | -4.31 | 0.5                                | 0.5309 | 6.18   | 0.2                                | 0.2362 | 18.11 |
| 1.0                                | 0.9571 | -4.29 | 1.0                                | 0.8794 | -12.06 | 0.5                                | 0.5219 | 4.37  |
| 2.0                                | 1.8269 | -8.66 | 2.0                                | 1.8916 | -5.42  | 1.0                                | 0.9482 | -5.18 |
| 4.0                                | 4.0843 | 2.11  | 4.0                                | 3.7558 | -6.10  | 2.0                                | 1.8453 | -7.73 |
|                                    |        |       | 8.0                                | 8.1375 | 1.72   | 4.0                                | 4.0759 | 1.90  |
| Average calibration curve equation |        |       | Average calibration curve equation |        |        | Average calibration curve equation |        |       |
| y=0.218x-0.032                     |        |       | y=0.392x-0.116                     |        |        | y=0.189x-0.013                     |        |       |
| R <sup>2</sup>                     |        |       | R <sup>2</sup>                     |        |        | R <sup>2</sup>                     |        |       |
| 0.994                              |        |       | 0.996                              |        |        | 0.997                              |        |       |



Table S15. NAG - Verification of linearity using the method specified in C17 of the document  
SANTE/2019/12682

| NAG                                                    |        |       |                                                        |         |         |                                                        |        |       |
|--------------------------------------------------------|--------|-------|--------------------------------------------------------|---------|---------|--------------------------------------------------------|--------|-------|
| Eggs                                                   |        |       | Bovine fat                                             |         |         | Milk                                                   |        |       |
| X                                                      | BCC    | Δ%    | X                                                      | BCC     | Δ%      | X                                                      | BCC    | Δ%    |
| 0.0                                                    | 0.0601 |       | 0.0                                                    | -0,1423 |         | 0.0                                                    | 0.0079 |       |
| 0.5                                                    | 0.4777 | -4.46 | 0.5                                                    | 0,4544  | -9,1216 | 0.2                                                    | 0.2292 | 14.59 |
| 1.0                                                    | 0.9874 | -1.26 | 1.0                                                    | 1,0474  | 4,7398  | 0.5                                                    | 0.5029 | 0.59  |
| 2.0                                                    | 1.9421 | -2.90 | 2.0                                                    | 2,1074  | 5,3717  | 1.0                                                    | 0.9102 | -8.98 |
| 4.0                                                    | 4.0327 | 0.82  | 4.0                                                    | 4,1432  | 3,5794  | 2.0                                                    | 2.0652 | 3.26  |
|                                                        |        |       | 8.0                                                    | 7,8899  | -1,3764 | 4.0                                                    | 3.9847 | -0.38 |
| Average calibration curve equation<br>$y=0.283x-0.017$ |        |       | Average calibration curve equation<br>$y=0.828x-0.124$ |         |         | Average calibration curve equation<br>$y=0.248x-0.002$ |        |       |
| R <sup>2</sup> 0.999                                   |        |       | R <sup>2</sup> 0,998                                   |         |         | R <sup>2</sup> 0.999                                   |        |       |
